# Supplementary material
Source: ML conference proceedings conference paper supplement (https://openreview.net/forum?id=DVSN9nJB1_)
Supplement: supplementary_material [file attachment]

# E-LANG: Energy-based Joint Inferencing of Super and Swift Language Models

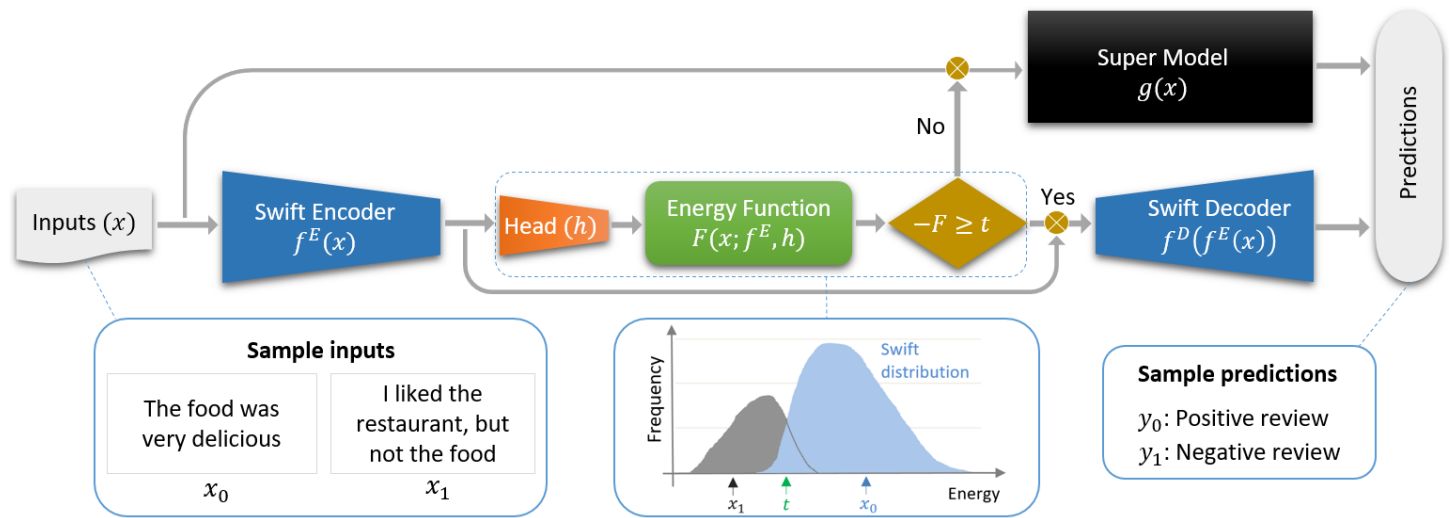

## Package Requirements

- Anaconda (version 2020.07)
- All the other requirements are listed in **environment.yml** file
- After installing Anaconda, use the following command to create an conda environment with the required packages:

```
conda env create -f environment.yml
```

- You can activate the environment using the following command:

```
conda activate elang
```

## Commands for training and evaluation

### Fine-tuning of T5 for downstream tasks

```
python main.py --train
                --model_type large
                --benchmark glue
                --task sst2
                --train_batch_size 8
                --steps 20000
                --save_steps 1000
```

- NOTE: before finetuning, the pre-trained T5 models need be downloaded from [the T5 repository](#). The datasets (e.g., GLUE) are also required to be downloaded from [Tensorflow-datasets](#).

### Evaluation of T5 for downstream tasks

```
python main.py --eval
                --model_type large
```

```
--benchmark glue
--task sst2
--eval_batch_size 1
```

## Training energy head of task-specific Swift

```
python main.py --train_head
                --model_type large
                --benchmark glue
                --task sst2
                --train_batch_size 8
                --steps 10000
                --save_steps 1000
```

## Task-specific energy-based joint inference

```
python main.py --eval
                --model_type large
                --teacher_model_type 11b
                --benchmark glue
                --task sst2
                --eval_batch_size 1
                --head
                --router=energy
                --thresholds_list=1.0,1.5,2.0,2.5
```

## Distillation-based fine-tuning of T5 for downstream tasks

```
python main.py --train
                --distill
                --model_type large
                --teacher_model_type 11b
                --benchmark glue
                --task sst2
                --train_batch_size 8
                --steps 20000
                --save_steps 1000
```

### Arguments:

- **train**: if included, train/finetune the model
- **distill**: if included, train/finetune the model along with distillation from teacher
- **train\_head**: if included, train the extra head
- **steps**: number of training steps
- **save\_steps**: frequency of saving the checkpoints
- **eval**: evaluate the model
- **head**: consider using the extra head
- **router**: type of the routing mechanism: e.g., 'energy', 'softmax', 'entropy', or 'random'
- **thresholds\_list**: list of threshold values for the routing mechanism (separated by comma)
- **model\_type**: the model type for the Swift (student) T5 model
- **teacher\_model\_type**: the model type for the Super (teacher) T5 model
- **benchmark**: select the benchmark: e.g., 'glue' or 'super\_glue'
- **task**: select the downstream task in the benchmark: e.g., 'cola', 'sst2', etc.

## Experimental Results

|                  |                            | GLUE        |             |             |             |             |             | SuperGLUE   |             |             |             |             |             | WMT         |             |
|------------------|----------------------------|-------------|-------------|-------------|-------------|-------------|-------------|-------------|-------------|-------------|-------------|-------------|-------------|-------------|-------------|
|                  |                            | MNLI        | QNLI        | SST2        | RTE         | MRPC        | COLA        | RTE         | BoolQ       | MRC         | COPA        | CB          | WIC         | WSC         | EnRo        |
| Swift<br>(Large) | Time (ms)                  | 216         | 283         | 57          | 263         | 160         | 56          | 287         | 303         | 201         | 96          | 223         | 185         | 133         | 1609        |
|                  | Accuracy (%)               | 89.7        | 93.9        | 95.5        | 90.3        | 90.9        | 62.7        | 88.5        | 84.3        | 80.7        | 81.0        | 92.0        | 72.7        | 86.5        | 28.6        |
| Super<br>(11B)   | Time (ms)                  | 821         | 980         | 281         | 964         | 433         | 213         | 818         | 3205        | 1731        | 268         | 844         | 671         | 2211        | 3041        |
|                  | Accuracy (%)               | 91.7        | 95.9        | 96.6        | 92.4        | 91.7        | 69.1        | 93.1        | <b>89.4</b> | 84.9        | <b>93.0</b> | 93.1        | 77.4        | 89.4        | 28.9        |
| E-LANG           | Accuracy (%)               | <b>91.7</b> | <b>96.0</b> | <b>96.6</b> | <b>92.4</b> | <b>92.2</b> | <b>69.5</b> | <b>93.2</b> | 88.7        | <b>84.9</b> | 90.0        | <b>93.1</b> | <b>78.1</b> | <b>89.4</b> | <b>28.9</b> |
|                  | FLOPs ( $\times 10^{11}$ ) | 47.8        | 25.7        | 29.5        | 50.4        | 11.5        | 39.9        | 42.0        | 50.8        | 46.9        | 52.6        | 13.4        | 40.3        | 20.6        | 63.4        |
|                  | Time (ms)                  | 582         | 495         | 132         | 716         | 190         | 147         | 671         | 1978        | 1022        | 222         | 302         | 447         | 545         | 2800        |
|                  | Swift Ratio (%)            | 49          | 75          | 70          | 46          | 91          | 58          | 56          | 45          | 50          | 43          | 89          | 57          | 81          | 30          |
|                  | Speed-up (FLOPs)           | 1.8X        | 3.4X        | 2.9X        | 1.7X        | 7.6X        | 2.2X        | 2.1X        | 1.7X        | 1.9X        | 1.7X        | 6.5X        | 2.2X        | 4.2X        | 1.4X        |
|                  | Speed-up (time)            | 1.4X        | 2.0X        | 2.1X        | 1.4X        | 2.3X        | 1.5X        | 1.2X        | 1.6X        | 1.7X        | 1.2X        | 2.8X        | 1.5X        | 4.1X        | 1.1X        |

Table 1: Joint inference results with T5 architecture on GLUE and SuperGLUE development sets, and WMT’s English-to-Romanian translation. The FLOPs for Super and Swift are respectively  $87 \times 10^{11}$  and  $4.25 \times 10^{11}$ .

|                                  | MNLI             | QNLI             | SST2             | RTE              | MRPC             | COLA             | Average          |
|----------------------------------|------------------|------------------|------------------|------------------|------------------|------------------|------------------|
| Super (11B)                      | 87.0/91.7        | 87.0/95.9        | 87.0/96.6        | 87.0/92.4        | 87.0/91.7        | 87.0/69.1        | 87.0/89.5        |
| Random (Encoder)                 | 78.5/91.5        | 61.9/95.3        | 58.7/96.3        | 60.2/91.2        | 47.5/91.9        | 61.6/67.2        | 61.4/88.9        |
| Softmax (Encoder)                | 57.7/91.6        | 36.5/95.9        | 34.6/96.5        | 52.0/92.3        | 13.8/92.1        | 45.7/69.3        | 40.1/89.6        |
| Entropy (Encoder)                | 55.7/91.6        | 27.1/96.0        | 40.2/96.5        | 50.7/92.0        | 23.0/92.2        | 48.1/69.3        | 40.8/89.6        |
| Energy (Swift <sub>small</sub> ) | 71.3/91.0        | 58.8/95.6        | 47.0/96.6        | 71.2/88.5        | 55.0/91.4        | 75.3/68.3        | 63.1/88.5        |
| Energy (Swift <sub>base</sub> )  | 54.5/91.5        | 50.5/95.8        | 35.9/96.6        | 55.8/90.6        | 44.0/91.9        | 50.6/68.4        | 48.5/89.1        |
| Energy (Decoder)                 | 57.9/90.6        | 68.1/95.5        | 75.8/96.3        | 60.5/91.5        | 20.2/90.9        | 45.1/69.3        | 54.6/89.0        |
| Energy (Encoder)                 | <b>47.8/91.7</b> | <b>25.7/96.0</b> | <b>32.0/96.6</b> | <b>50.4/92.4</b> | <b>11.5/92.2</b> | <b>39.9/69.5</b> | <b>34.5/89.7</b> |

Table 2: Ablation study on different T5-based scenarios. Each cell shows FLOPs/Accuracy.

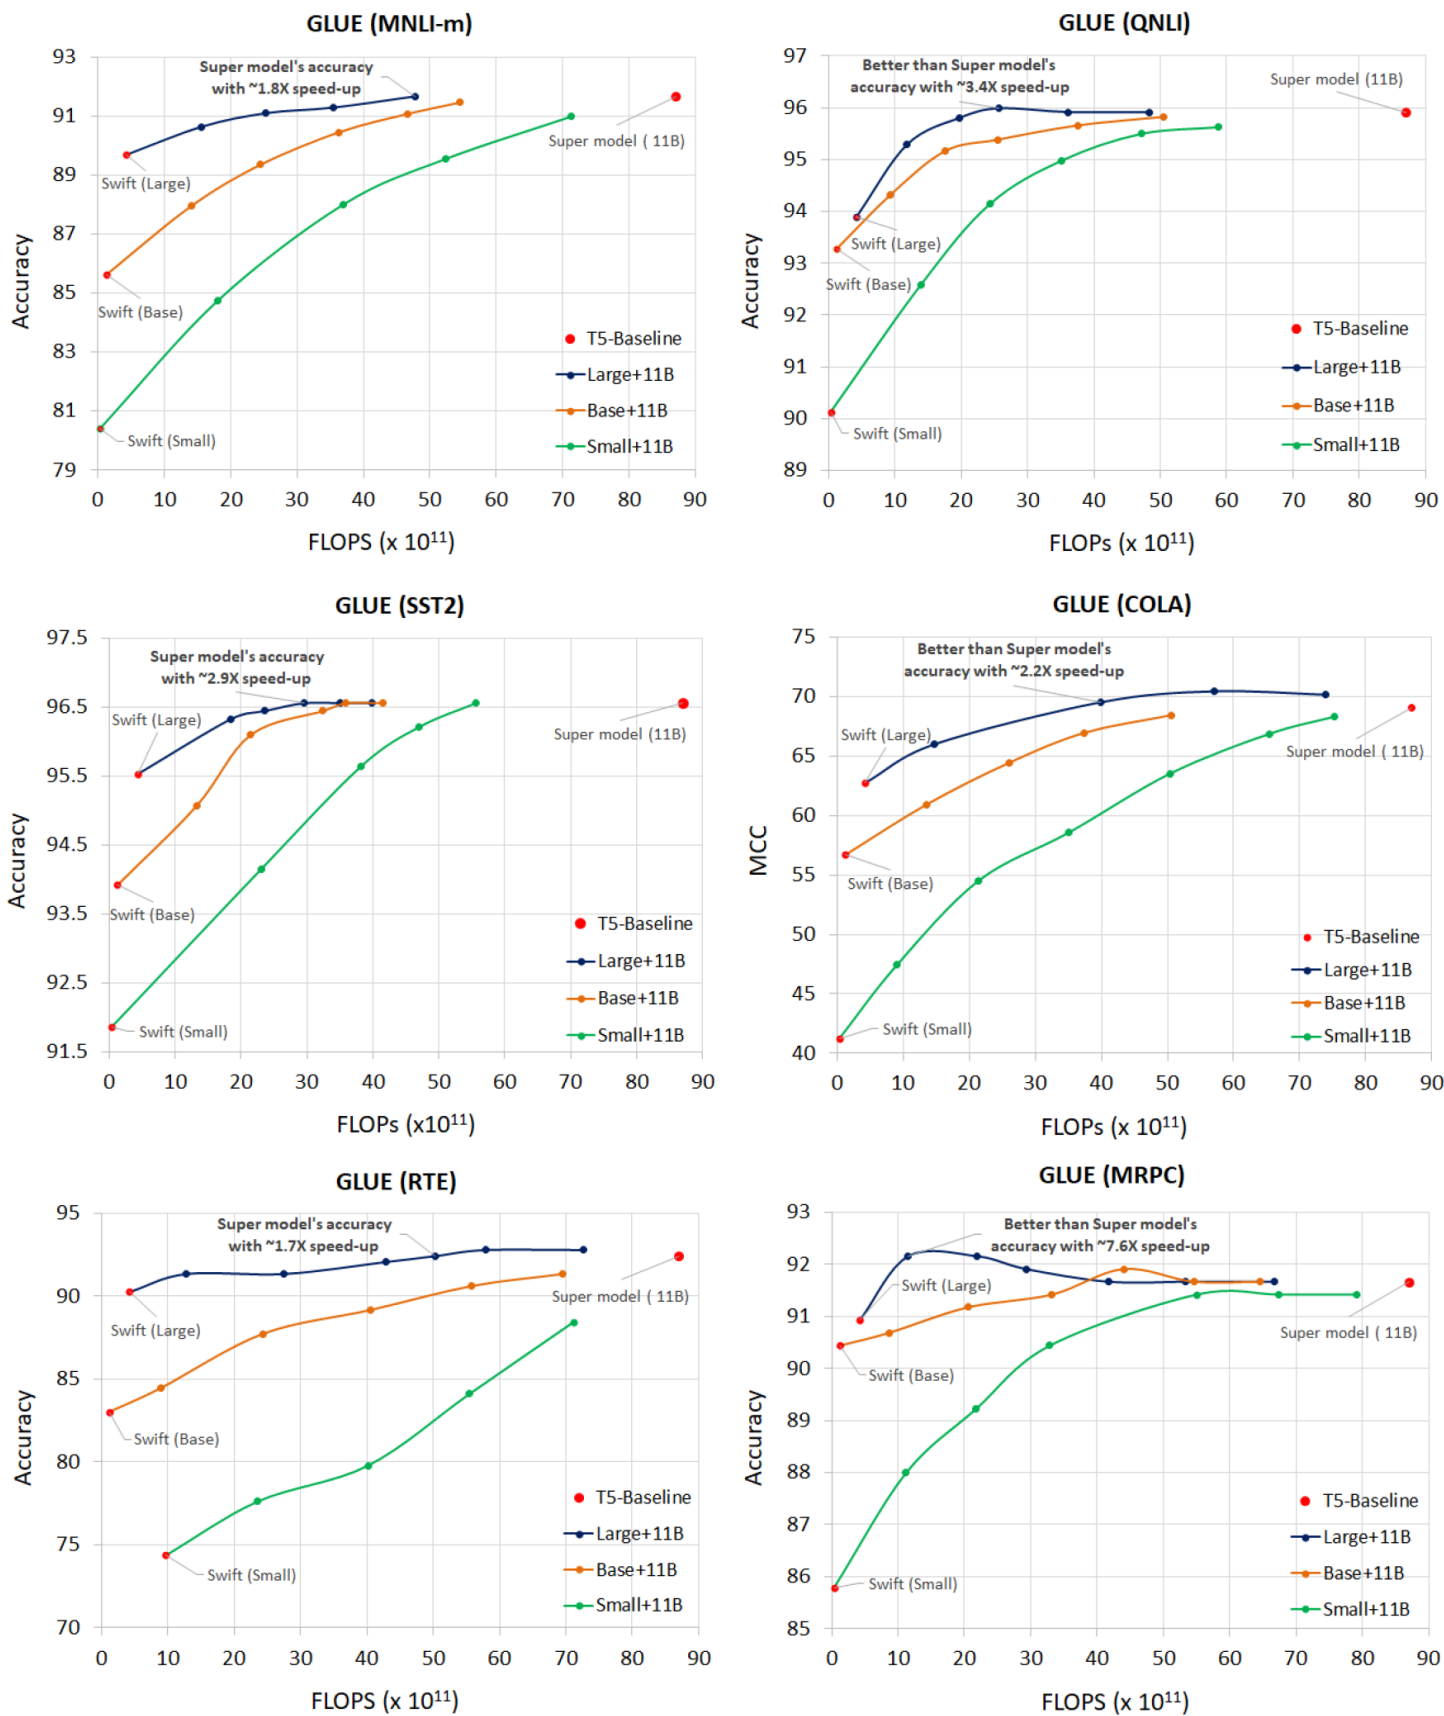

Figure 5: Trade-off curves with T5 backbone on GLUE tasks.
